# Supplementary material for: Distinct Contribution of the HtrA Protease and PDZ Domains to Its Function in Stress Resilience and Virulence of Bacillus anthracis
Source: Front Microbiol. 2019 Feb 18;10:255. doi: 10.3389/fmicb.2019.00255 (PMC6387919; doi:10.3389/fmicb.2019.00255)
Supplement: Supplementary file 1 [file Data_Sheet_1.pdf]

# **Distinct Contribution of the HtrA Protease and PDZ Domains to its Function in Stress Resilience and Virulence of *Bacillus anthracis***

**Ma'ayan Israeli, Uri Elia, Shahar Rotem, Hila Cohen, Avital Tidhar, Adi  
Bercovich-Kinori, Ofer Cohen, Theodor Chitlaru**

## **Supplementary Material**

### **Supplementary Table S1**

*E. coli* bacterial strains, plasmids and oligonucleotide primers used in this study.

### **Supplementary Figure S1**

Expression of the trans-complementation forms of HtrA<sub>BA</sub> (HtrA FL, HtrA $\Delta$ PDZ and HtrAS255A) in *E. coli*, purification and functionality assays.

### **Supplementary Figure S2**

Schematic representation of the chromosomal HtrA<sub>BA</sub> locus and of the strains exhibiting modified chromosomal HtrA<sub>BA</sub> alleles.

### **Supplementary Figure S3**

Growth of the WT parental  $\Delta V$ ,  $\Delta V\Delta htrA$ , and the trans-complemented strains  $\Delta V\Delta htrA/HtrA$ ,  $\Delta V\Delta htrA/HtrA\Delta PDZ$  and  $\Delta V\Delta htrA/HtrAS255A$  at 37°C and 42°C.

### **Supplementary Figure S4**

Expression of S-layer proteins by the *B. anthracis* parental WT  $\Delta V$ , the  $\Delta V\Delta htrA$  and the  $\Delta V$  strains exhibiting modified *htrA* alleles  $\Delta VhtrA\Delta PDZ$  and  $\Delta VhtrAS255A$ , as well as the trans-complemented strains  $\Delta V\Delta htrA/HtrA$ ,  $\Delta V\Delta htrA/HtrA\Delta PDZ$  and  $\Delta V\Delta htrA/HtrAS255A$ .

**Supplementary TABLE S1** | *E. coli* bacterial strains, plasmids and oligonucleotide primers used in this study. *B. anthracis* strains are detailed in Table 1.

| <i>E. coli</i> Strain                  | Description                                                                                                                                          | Source                |
|----------------------------------------|------------------------------------------------------------------------------------------------------------------------------------------------------|-----------------------|
| DH5α                                   | <i>endA1 recA1</i>                                                                                                                                   | Bioline               |
| BL21 (DE3)                             | 15::Kan (DE3)                                                                                                                                        | Novagen               |
| <i>dam<sup>-</sup> dcm<sup>-</sup></i> | Dam13::Tn9(Cm <sup>R</sup> )dcm-6                                                                                                                    | NEB                   |
| Plasmids                               | Description                                                                                                                                          | Reference             |
| pASC-α                                 | pASCα-derived PA expression vector under <i>amy</i> promoter                                                                                         | Chitlaru et al., 2011 |
| pASC-α HtrA                            | pASC-α htrA expression vector with C' 6*His tag between <i>SnaBI</i> and <i>BamHI</i> sites                                                          | This study            |
| pASC-α N'Htra                          | pASC-α N'htrA (containing nucleotides 1-900 of the <i>htrA</i> gene) expression vector with C' 6*His tag between <i>SnaBI</i> and <i>BamHI</i> sites | This study            |
| pASC-α HtrA <sub>S255A</sub>           | Protease mutant <i>htrA</i> expression vector with C' 6*His tag between <i>SnaBI</i> and <i>BamHI</i> sites                                          | This study            |
| pEGS-cya                               | Allelic replacement vector for <i>cya</i> deletion                                                                                                   | Levy et al 2012       |
| pEGS-N'HtrA                            | Allelic replacement vector for deletion of C'htrA (900-1242bp)                                                                                       | This study            |
| pEGS-HtrA <sub>S255A</sub>             | Allelic replacement vector for mutation of HtrA protease active site (htrA <sub>S255A</sub> )                                                        | This study            |
| pXX-IsceI                              | PXX- I sceI endonuclease expression vector, Km <sup>R</sup>                                                                                          | Levy et al 2012       |
| pET-21b                                | Amp <sup>R</sup> , <i>E.coli</i> expression vector                                                                                                   | Novagen               |
| pET-21b-HtrA                           | pET-21b expression vector with HtrA at <i>EcoRI</i> and <i>XhoI</i> sites                                                                            | This study            |
| pET-21b-N'HtrA                         | pET-21b expression vector with N'HtrA (1-900bp) at <i>EcoRI</i> and <i>XhoI</i> sites                                                                | This study            |
| pET-21b-HtrA <sub>S255A</sub>          | pET-21b expression vector with HtrA <sub>S255A</sub> at <i>EcoRI</i> and <i>XhoI</i> sites                                                           | This study            |
| Primer*                                | sequence                                                                                                                                             | Use                   |
| BA531                                  | agacctagatcttatacaaaaaggagtacgtatATGG<br>GATATTACGACGGACCA                                                                                           | Cloning of htrA-6XHis |
| BA819C                                 | agatagacctggattcttaatggtgatggtgatggtgTT<br>GATTCTTTGTAGCTGAGTTATCT                                                                                   | Cloning of htrA-6XHis |

|                    |                                                                             |                                    |
|--------------------|-----------------------------------------------------------------------------|------------------------------------|
| BA818              | TGAGAAGAAAAAAGTAGGCGAGA<br>AAG                                              | Sequencing of<br>EC1489            |
| BA820C             | <b>ggattc</b> ttaatggtgatggtgatggtg                                         | PCR detection of<br>transformants  |
| BA821C             | agatagacct <b>ggattc</b> ttaatggtgatggtgatggtgTT<br>TTTCAAGTGATTCAATAACTGGT | Cloning of<br>N'htrA-6XHis         |
| BA822              | ATAAGCGTGCAGATTGGAATGCTC<br>AA                                              | PCR detection of<br>transformants  |
| BA825C             | CCCGATTTTCTCACTTCTCTCG                                                      | Sequencing of<br>EC1491            |
| BA826              | GGTGCTAATGTTAATAAAGTTGCC                                                    | Sequencing of<br>EC1491            |
| BA827              | agatacct <b>GCGGCCG</b> CATGGGATATTA<br>CGACGGACCAA                         | Cloning of<br>EC1495 and<br>EC1496 |
| BA828C             | gtcttc <b>ACTAG</b> TTTATTTTCAAGTGA<br>TTCAATAACTGG                         | Cloning of<br>EC1495               |
| BA829              | gtcttc <b>ACTAG</b> TTCGGAATAAAAGAA<br>AGTCTCT                              | Cloning of<br>EC1495               |
| BA830C             | agacct <b>GGCGCGC</b> CTCTTCATTATAT<br>TGGAAGTAT                            | Cloning of<br>EC1495               |
| BA831C             | agacct <b>GGCGCGC</b> CTTATTGATTCTT<br>TGTAGCTGAGT                          | Cloning of<br>EC1496               |
| htrA-pET-for-EcoRI | gcaaatgggtcgggatcc <b>gaattc</b> ATGGGATAT<br>TACGACGGACCA                  | Cloning of HtrA<br>to pET-21b      |
| htrA-pET-rev-Xho-S | cctttcgggctttgtagcagccggtc <b>cctcgag</b> TTAA<br>TGGTGATGGTGATGGTG         | Cloning of HtrA<br>to pET-21b      |

\* The homology region to the coding sequence is marked in capital letters while homology to vector-derived sequences are in lowercase letters. The restriction sites used for the cloning of the corresponding PCR fragment are in bold.

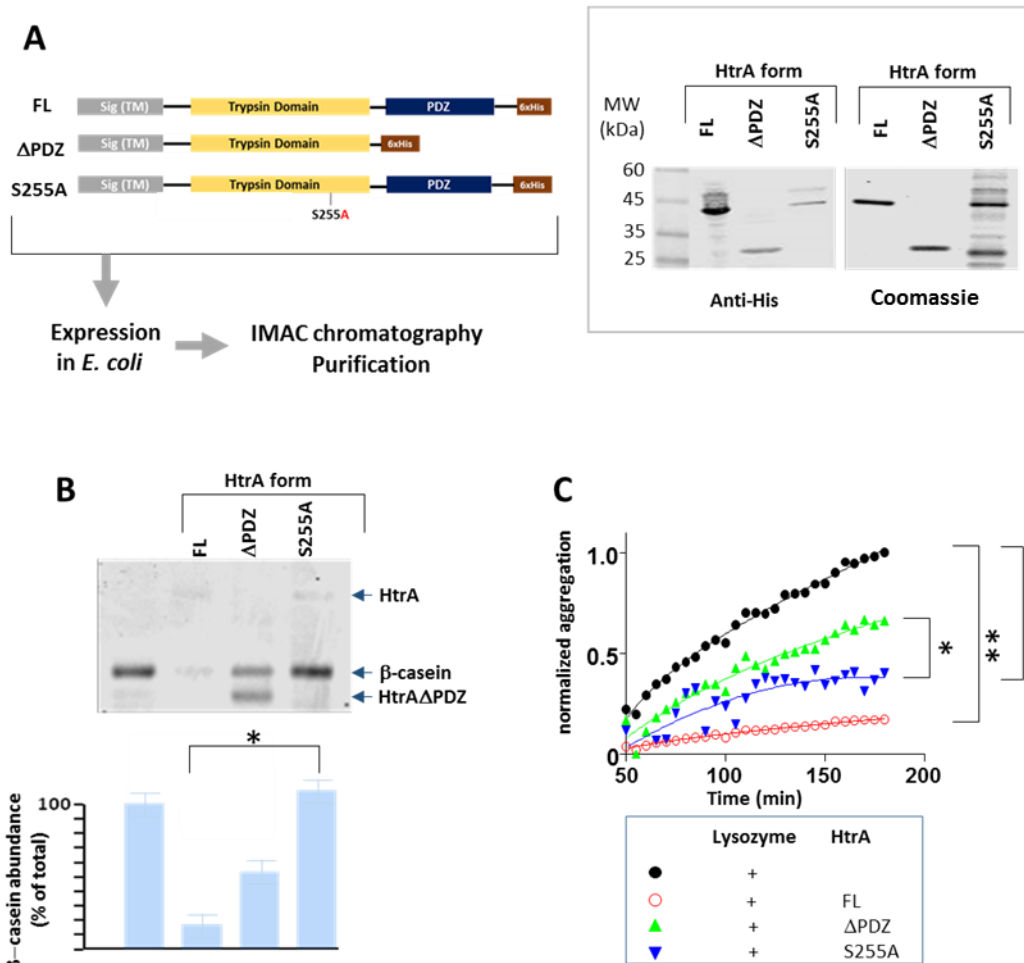

**Supplementary Figure S1** | Expression of the trans-complementation forms of HtrA<sub>BA</sub> (HtrA FL, HtrA $\Delta$ PDZ and HtrAS255A) in *E. coli*, purification and functionality assays. **(A)** Schematic representation of the HtrA forms expressed in *E. coli*. Right boxed panel: Western blot analysis of purified forms of HtrA<sub>BA</sub> following IMAC (immobilized metal affinity chromatography). While the full-length and the  $\Delta$ PDZ forms of HtrA were obtained in highly enriched fractions by IMAC, the HtrAS255A form could not be purified to homogeneity, as attested by the commassie-blue stained gel. Note that the additional bands do not react with the anti-his tag or anti-HtrA antibodies, establishing that they do not represent degraded forms of HtrA. The identity of these proteins and the reason for their co-elution only with the His-tagged HtrAS255A form but not with the FL or  $\Delta$ PDZ forms, was not further studied. **(B)**  $\beta$ -Casein proteolysis assay using the different forms of HtrA<sub>BA</sub>. Upper panel depicts the SDS-PAGE of the reactions, lower panel represents scan quantification of the  $\beta$ -casein bands from the gel, using an Odyssey CLx scanner (Li-Cor Biosciences, Lincoln, NE, USA) and analyzed by the Li-Cor Image Studio (ver. 5.2). Note the complete loss of proteolytic activity by the S255A form of HtrA<sub>BA</sub>; \* $p$ <0.05, by student t-test. **(C)** Lysozyme aggregation assay in the presence/absence of the various HtrA<sub>BA</sub> forms. Note that the  $\Delta$ PDZ form is significantly more affected in its ability to prevent aggregation of the substrate, in line with the notion that the PDZ domain is required for the optimal chaperone activity of HtrA. Statistical significance was determined by a global non-linear regression analysis using the GraphPad Prism 5.0 software (GraphPad Software, San-Diego, CA, USA); \* $p$ <0.05, \*\* $p$ <0.01.

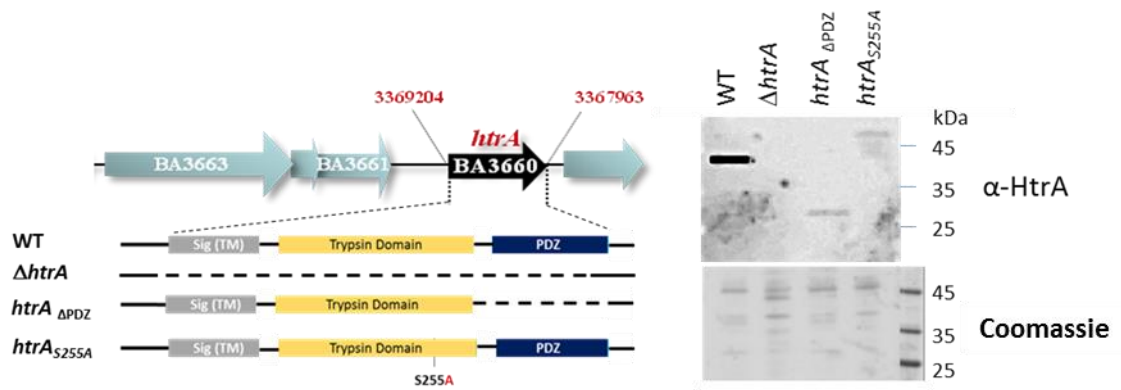

**Supplementary Figure S2** | Schematic representation of the chromosomal HtrA<sub>BA</sub> locus and of the strains exhibiting modified chromosomal HtrA<sub>BA</sub> alleles. Modification of the *B. anthracis* chromosomal *htrA* gene enables comparison between *B. anthracis* wild-type, *B. anthracis*  $\Delta htrA$  and novel strains containing an *htrA* truncated allele (*htrA* $_{\Delta PDZ}$ ) or a mutated allele (*htrA* $_{S255A}$ ). HtrA<sub>BA</sub> is encoded by the indicated mono-cistronic gene (NCBI locus BA3660). The position of the locus in the *B. anthracis* Ames ancestor genomic sequence is indicated. Right panel: Western-blot analysis using anti-HtrA antibodies of cellular extracts of the 4 strains described in the left scheme. Note that the HtrA form expressed in the *htrA* $_{S255A}$  strain, exhibits a slower electrophoretic migration due to its failure to be auto-lytically processed (see Section 3.2).

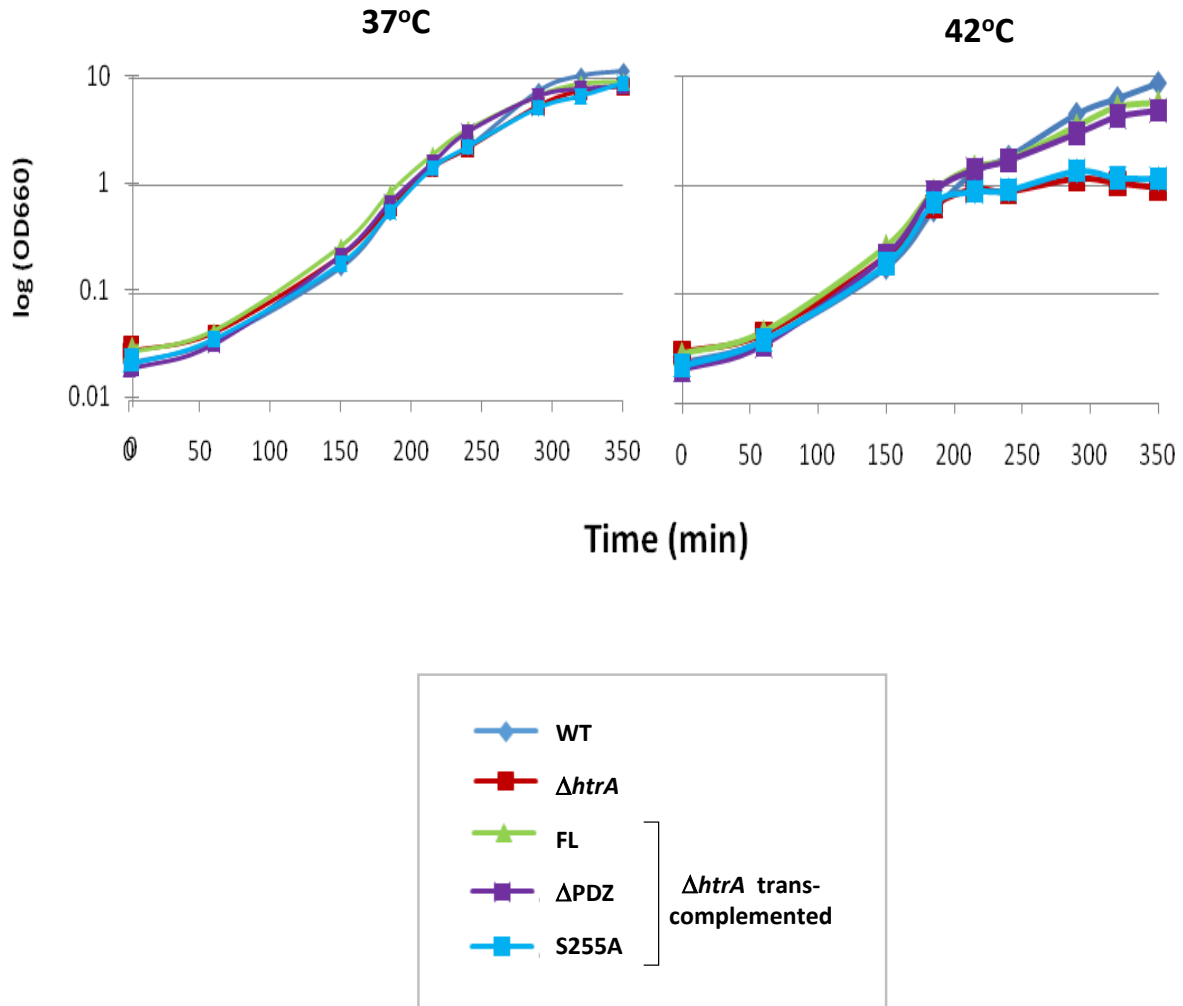

**Supplementary Figure S3** | Growth of the WT parental  $\Delta V$  strain,  $\Delta V\Delta htrA$ , and the trans-complemented strains  $\Delta V\Delta htrA/HtrA$ ,  $\Delta V\Delta htrA/HtrA\Delta PDZ$  and  $\Delta V\Delta htrA/HtrAS255A$  at 37°C and 42°C. The various strains were grown in BHI medium. Over-night cultures of the 5 strains (OD= 10-13) were used to inoculate fresh BHI at a starting OD of 0.05. At the indicated time, when the cultures were in the mid-log phase (OD=1), the cultures were split into two twin flasks which were incubated at 37°C or 42°C.

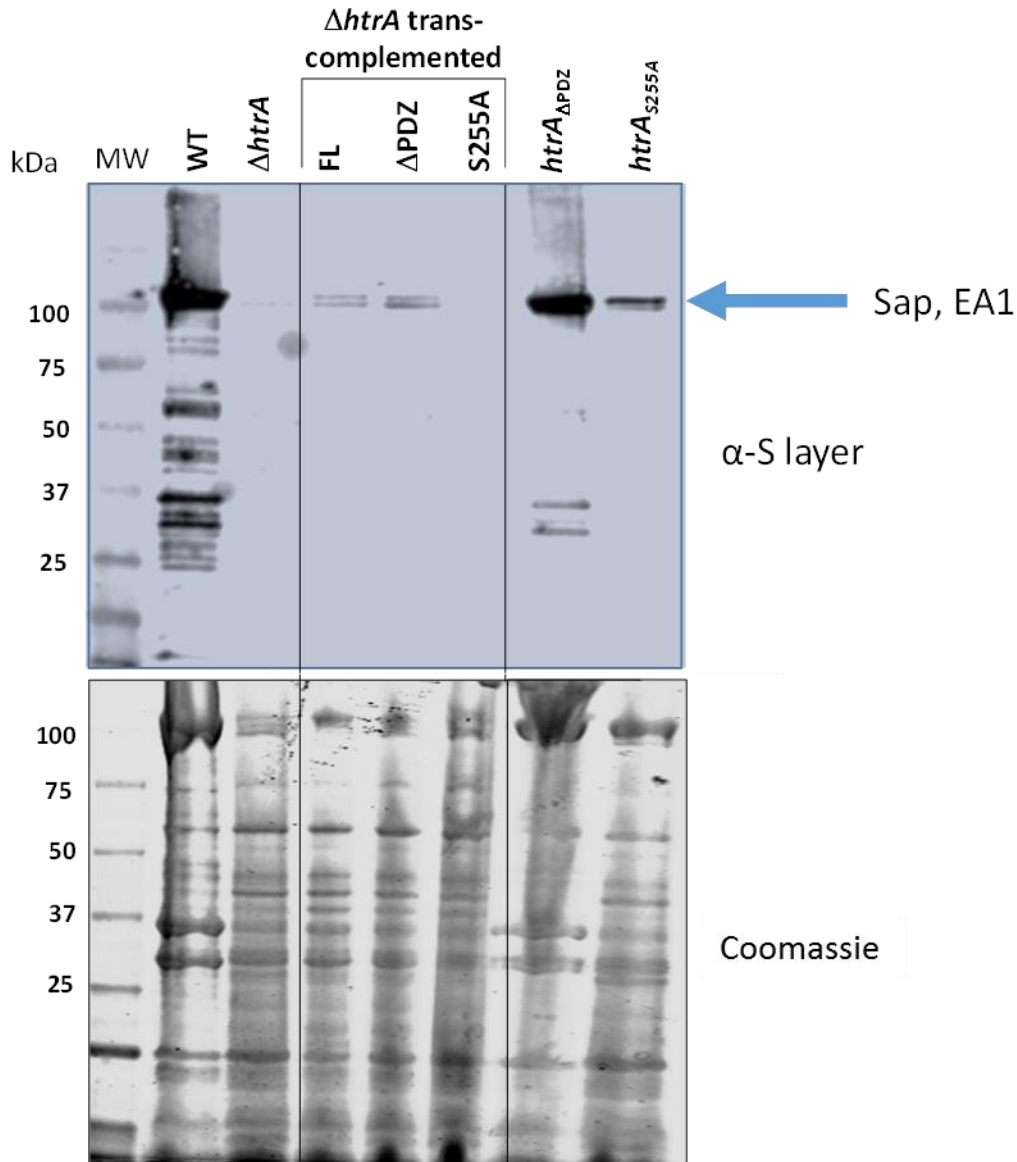

**Supplementary Figure S4** | Expression of S-layer proteins by the *B. anthracis* parental WT  $\Delta V$ , the  $\Delta V \Delta htrA$  and the  $\Delta V$  strains exhibiting modified *htrA* alleles  $\Delta V htrA_{\Delta PDZ}$  and  $\Delta V htrA_{S255A}$ , as well as the trans-complemented strains  $\Delta V \Delta htrA/HtrA$ ,  $\Delta V \Delta htrA/HtrA_{\Delta PDZ}$  and  $\Delta V \Delta htrA/HtrA_{S255A}$ . The various strains were grown in BHI media for 18 hours. Bacterial cells were washed in PBS and boiled in SDS-PAGE buffer for 15 minutes before analysis. Equal cell equivalent volumes (approx.. 10 OD) of the 5 cultures were loaded for Western blot analysis using antibodies specific for both the Sap and EA1 S-layer proteins. See and **Table 1**, **Figure 1** and **Supplementary Figure S2** for details regarding the various strains exhibiting modified *HtrA*<sub>BA</sub> alleles and  $\Delta htrA$  strains trans-complemented with different forms of *HtrA*<sub>BA</sub>.
